# Supplementary material for: Safety and Efficacy of an Oncolytic Adenovirus as an Immunotherapy for Canine Cancer Patients
Source: MDPI journal article supplement (doi:10.3390/vetsci9070327), 2022-06-28
Supplement: s1 [file s1]

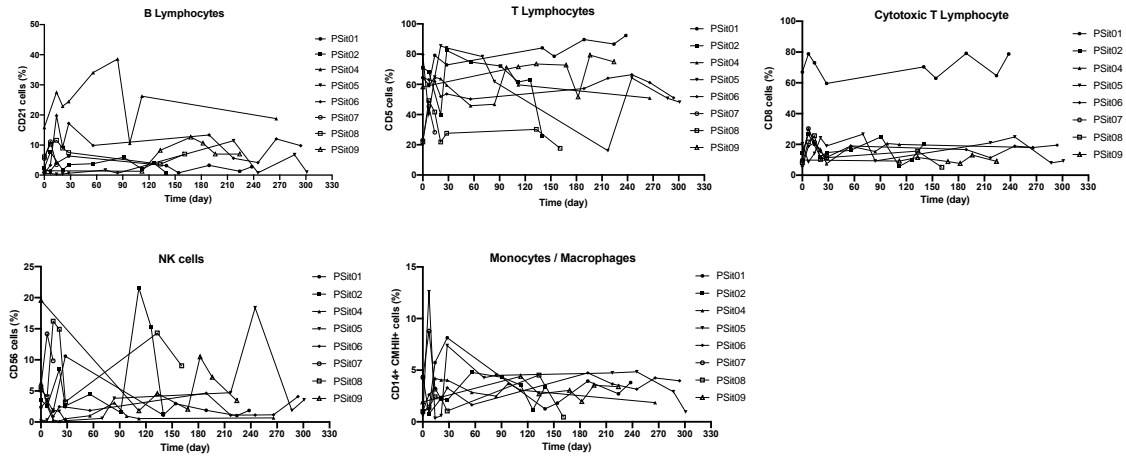

**Figure S1. Immune cell phenotype.** Immune cell populations in peripheral blood from the day of treatment (d0) and during the first year of follow-up.

**Table S1. Quality of life questionnaire.** Adapted from [42]

|                                                                                 |                                 |                              |                |
|---------------------------------------------------------------------------------|---------------------------------|------------------------------|----------------|
| <b>How much do you think the disease affects your dog's quality of life?</b>    |                                 |                              |                |
| A lot (0)                                                                       | Quite a lot (1)                 | A Little (2)                 | Not at all (3) |
| <b>Does he/she still do the activities he/she likes ( playing, walking...)?</b> |                                 |                              |                |
| No (0)                                                                          | Infrequently (1)                | Frequently (2)               | As usual (3)   |
| <b>How is your dog's mood?</b>                                                  |                                 |                              |                |
| Altered (0)                                                                     | Sometimes altered (1)           | Slightly changed (2)         | Normal (3)     |
| <b>Does he/she maintain his/her grooming habits?</b>                            |                                 |                              |                |
| No (0)                                                                          | Infrequently (1)                | Less than before illness (2) | Yes(3)         |
| <b>How often do you think your dog experiences pain?</b>                        |                                 |                              |                |
| All the time(0)                                                                 | Frequently (1)                  | Rarely (2)                   | Never (3)      |
| <b>Does your pet have appetite?</b>                                             |                                 |                              |                |
| No (0)                                                                          | Forced or food he/she likes (1) | Less than usual (2)          | Normal (3)     |
| <b>Does your pet get tired easily?</b>                                          |                                 |                              |                |
| Yes (0)                                                                         | Frequently (1)                  | Rarely (2)                   | No (3)         |
| <b>How would you rate your dog's rest?</b>                                      |                                 |                              |                |
| Very bad (0)                                                                    | Bad (1)                         | Almost normal (2)            | Normal (3)     |
| <b>How often does your dog vomit?</b>                                           |                                 |                              |                |
| Always (0)                                                                      | Frequently (1)                  | Rarely (2)                   | Never (3)      |
| <b>How would you rate your dog's intestinal functionality?</b>                  |                                 |                              |                |
| Very bad (0)                                                                    | Bad (1)                         | Almost normal (2)            | Normal (3)     |
| <b>Is your dog able to position himself to urinate and defecate?</b>            |                                 |                              |                |
| Never (0)                                                                       | Rarely (1)                      | Frequently (2)               | Yes (3)        |
| <b>How much attention does your dog pay to the family?</b>                      |                                 |                              |                |
| Indifferent (0)                                                                 | Little attention (1)            | Increased attention (2)      | No change (3)  |

**Table S2. Tumor infiltrated by immune cells, endothelial cells, and oncolytic virus. ICOCV15 detected by qPCR (#) or IHC. \*ICOCV15 administered. M: metastatic tissue. N/A: not assessed.**

|        |                 |                  | CD3    | CD4      | CD20     | MAC387   | CD31     | ICOCV15    |
|--------|-----------------|------------------|--------|----------|----------|----------|----------|------------|
| PSit01 | Necropsy (d282) | Tumor            | Medium | Negative | Low      | Low      | Negative | Positive   |
|        |                 | Lung (M)         | N/A    | N/A      | N/A      | N/A      | N/A      | Negative   |
|        |                 | Liver (M)        | N/A    | N/A      | N/A      | N/A      | N/A      | Positive   |
|        |                 | Spleen           | N/A    | N/A      | N/A      | N/A      | N/A      | Negative   |
| PSit02 | Tumor           | d0 *             | Medium | Negative | Medium   | Medium   | Negative | N/A        |
|        |                 | d28              | High   | High     | High     | Medium   | Negative | Positive   |
|        |                 | d112 *           | Medium | Medium   | Medium   | Medium   | Negative | Negative   |
|        |                 | d140             | High   | Medium   | High     | High     | Low      | Negative   |
|        |                 | d221             | Medium | High     | High     | High     | Low      | Positive   |
|        | Necropsy (d332) | Tumor            | High   | Medium   | High     | High     | Low      | Positive   |
|        |                 | Liver            | N/A    | N/A      | N/A      | N/A      | N/A      | Positive   |
| Spleen |                 | N/A              | N/A    | N/A      | N/A      | N/A      | Positive |            |
| PSit04 | Tumor           | d0 *             | Low    | Low      | Medium   | Low      | Negative | N/A        |
|        |                 | d28              | High   | Medium   | High     | Medium   | Low      | Positive # |
|        |                 | d84 *            | Medium | Medium   | Medium   | Medium   | Low      | Negative   |
|        |                 | d185 *           | High   | Medium   | High     | High     | Low      | Positive # |
| PSit05 | Necropsy (d332) | Tumor            | Medium | Low      | Negative | High     | Low      | Positive   |
|        |                 | Liver            | N/A    | N/A      | N/A      | N/A      | N/A      | Negative   |
|        |                 | Spleen           | N/A    | N/A      | N/A      | N/A      | N/A      | Positive   |
| PSit06 | Tumor           | d0 *             | High   | Low      | Medium   | Low      | Negative | N/A        |
|        |                 | d28              | High   | Low      | Medium   | Medium   | Low      | Positive   |
|        |                 | d126 *           | High   | Low      | High     | Negative | Negative | Positive   |
|        |                 | d244 *           | Low    | Medium   | Negative | Low      | Negative | Positive   |
|        |                 | d350             | High   | Medium   | Medium   | Low      | Low      | Positive   |
| PSit07 | Tumor           | d0 *             | High   | Medium   | Medium   | Low      | Low      | N/A        |
|        | Necropsy (d21)  | Tumor            | Medium | Medium   | Negative | Medium   | Negative | Positive   |
|        |                 | Liver            | N/A    | N/A      | N/A      | N/A      | N/A      | Positive   |
|        |                 | Spleen           | N/A    | N/A      | N/A      | N/A      | N/A      | Positive   |
| PSit08 | Tumor           | d0 *             | High   | Low      | Medium   | Low      | Negative | N/A        |
|        |                 | d42              | Low    | Low      | Negative | Low      | Negative | Negative   |
| PSit09 | Tumor           | d0 *             | High   | High     | Low      | Low      | Negative | N/A        |
|        | Necropsy (388)  | Pelvic tumor (M) | Medium | Medium   | Low      | Medium   | Low      | Positive   |
|        |                 | Ribwall tumor    | Low    | Medium   | Low      | Medium   | Negative | Positive   |
